# Supplementary material for: Prevalence, Resistance Patterns and Biofilm Production Ability of Bacterial Uropathogens from Cases of Community-Acquired Urinary Tract Infections in South Italy
Source: MDPI journal article supplement (doi:10.3390/pathogens12040537), 2023-03-29
Supplement: s1 [file s1]

**Table S1.** Characteristics of 60 isolates antibiotic resistant

| Isolates | Bacteria                                | Sex    | Biofilm formation ability | Resistance profile                    | Antimicrobial resistance classification |
|----------|-----------------------------------------|--------|---------------------------|---------------------------------------|-----------------------------------------|
| -        | <i>Escherichia coli</i> ATCC 25922      | -      | Strong                    |                                       |                                         |
| -        | <i>Klebsiella pneumoniae</i> ATCC 13883 | -      | Moderate                  |                                       |                                         |
| -        | <i>Proteus mirabilis</i> ATCC 35659     | -      | Moderate                  |                                       |                                         |
| 126E     | <i>Escherichia coli</i>                 | Female | Weak                      | Amp; Nor;Amc; Caz; Gm; Ert            | MDR                                     |
| 15E      | <i>Escherichia coli</i>                 | Female | Moderate                  | Amp; Amc; Ctx; Caz; Gm; Mem           | MDR                                     |
| 102E     | <i>Escherichia coli</i>                 | Female | Moderate                  | Amp; Amc; Ctx; Caz; Gm;               | MDR                                     |
| 75E      | <i>Escherichia coli</i>                 | Male   | Moderate                  | Amp; Amc; Ctx; Caz; Gm;               | MDR                                     |
| 26E      | <i>Escherichia coli</i>                 | Male   | Strong                    | Amp; Nor; Amc; Cip; Ctx; Caz; Gm; Ert | MDR                                     |
| 12E      | <i>Escherichia coli</i>                 | Female | Moderate                  | Amp; Amc; Cip; P/T; Gm                | MDR                                     |
| 184E     | <i>Escherichia coli</i>                 | Female | Strong                    | Amp; Amc, Fos Ert                     | MDR                                     |
| 207E     | <i>Escherichia coli</i>                 | Male   | Negative                  | Amp; Amc; P/T                         | Non- MDR                                |
| 151E     | <i>Escherichia coli</i>                 | Female | Moderate                  | Amp; Amc; Sxt; Fos                    | MDR                                     |
| 286E     | <i>Escherichia coli</i>                 | Male   | Weak                      | Amp; Amc; Ctx; Caz; Ert               | MDR                                     |
| 301E     | <i>Escherichia coli</i>                 | Male   | Moderate                  | Amp; Amc; Ctx; Caz;                   | Non- MDR                                |
| 302E     | <i>Escherichia coli</i>                 | Female | Negative                  | Amp; Amc; Gm                          | Non- MDR                                |
| 325E     | <i>Escherichia coli</i>                 | Female | Moderate                  | Amp; Amc; Cip                         | Non- MDR                                |
| 401E     | <i>Escherichia coli</i>                 | Female | Strong                    | Amp; Amc; Ctx; Caz; Gm; Ak            | MDR                                     |
| 510E     | <i>Escherichia coli</i>                 | Female | Strong                    | Amp; Amc; Ctx; Caz; Gm;               | MDR                                     |
| 615E     | <i>Escherichia coli</i>                 | Male   | Strong                    | Cip; Ctx; Caz; Gm                     | Non- MDR                                |
| 722E     | <i>Escherichia coli</i>                 | Male   | Negative                  | Nor; Cip; Gm                          | Non- MDR                                |
| 723E     | <i>Escherichia coli</i>                 | Male   | Strong                    | Nor; Sxt; Cip; Gm; Ert                | MDR                                     |
| 733E     | <i>Escherichia coli</i>                 | Male   | Weak                      | Amc; Cip; Gm; P/T                     | MDR                                     |
| 761E     | <i>Escherichia coli</i>                 | Female | Moderate                  | Amp; Amc; Cip; Caz; Gm                | MDR                                     |
| 66K      | <i>Klebsiella pneumonise</i>            | Female | Strong                    | Amp; Nor; Amc; Cip; Ctx; Caz; Gm; Ak  | MDR                                     |
| 11K      | <i>Klebsiella pneumonise</i>            | Male   | Strong                    | Amp; Nor; Amc; Stx; Cip; Ctx; Caz     | MDR                                     |

|      |                              |        |          |                                   |          |
|------|------------------------------|--------|----------|-----------------------------------|----------|
| 13K  | <i>Klebsiella pneumoniae</i> | Female | Moderate | Amp; Amc; Cip; Ctx; Caz           | MDR      |
| 27K  | <i>Klebsiella pneumoniae</i> | Male   | Moderate | Amp; Cip; Stx; Ctx; Caz           | MDR      |
| 33K  | <i>Klebsiella pneumoniae</i> | Male   | Strong   | Amp; Cip; Stx; Gm; Ak             | MDR      |
| 105K | <i>Klebsiella pneumoniae</i> | Female | Weak     | Amp; Cip; Ctx; Caz                | Non- MDR |
| 60K  | <i>Klebsiella pneumoniae</i> | Female | Negative | Amp; Cip; Ctx; Caz                | Non- MDR |
| 41K  | <i>Klebsiella pneumoniae</i> | Female | Moderate | Amp; Cip; Ctx; Caz                | Non- MDR |
| 88K  | <i>Klebsiella pneumoniae</i> | Male   | Moderate | Amp; Ctx; Caz                     | Non- MDR |
| 15K  | <i>Klebsiella pneumoniae</i> | Female | Moderate | Amp; Cip; Ctx; Fos                | MDR      |
| 47K  | <i>Klebsiella pneumoniae</i> | Male   | Weak     | Amp; Cip; Fos; Gm                 | MDR      |
| 51K  | <i>Klebsiella pneumoniae</i> | Male   | Weak     | Amp; Ctx                          | Non- MDR |
| 83K  | <i>Klebsiella pneumoniae</i> | Male   | Strong   | Amp; Nor; Sxt; Caz; Gm            | MDR      |
| 108K | <i>Klebsiella pneumoniae</i> | Female | Moderate | Amp; Nor; Sxt                     | Non- MDR |
| 93K  | <i>Klebsiella pneumoniae</i> | Female | Moderate | Amp; Sxt                          | Non- MDR |
| 101K | <i>Klebsiella pneumoniae</i> | Female | Negative | Amp; Sxt                          | Non- MDR |
| 118K | <i>Klebsiella pneumoniae</i> | Female | Strong   | Amp; Cip; Ctx; Gm                 | MDR      |
| 12K  | <i>Klebsiella pneumoniae</i> | Female | Weak     | Amp; Nor                          | Non- MDR |
| 2K   | <i>Klebsiella pneumoniae</i> | Male   | Moderate | Amp; Nor; Gm Fos; Ert             | MDR      |
| 128K | <i>Klebsiella pneumoniae</i> | Female | Weak     | Amp                               | Non- MDR |
| 11P  | <i>Proteus mirabilis</i>     | Male   | Moderate | Amp; Amc;                         | Non- MDR |
| 81P  | <i>Proteus mirabilis</i>     | Female | Strong   | Amp; Amc; Cip; Ak; Mem            | MDR      |
| 26P  | <i>Proteus mirabilis</i>     | Female | Moderate | Amp; Nit; Stx; Ctx; Caz Ert       | MDR      |
| 71P  | <i>Proteus mirabilis</i>     | Male   | Moderate | Amp; Amc; Stx; Ctx; Caz; Fos      | MDR      |
| 28P  | <i>Proteus mirabilis</i>     | Female | Moderate | Amp; Amc; Stx; Gm                 | MDR      |
| 15P  | <i>Proteus mirabilis</i>     | Male   | Strong   | Amp; Amc; Stx; Ctx; Caz; Fos; Imi | MDR      |
| 33P  | <i>Proteus mirabilis</i>     | Female | Weak     | Amc; Cip                          | Non- MDR |
| 50P  | <i>Proteus mirabilis</i>     | Male   | Weak     | Cip; Stx                          | Non- MDR |
| 42P  | <i>Proteus mirabilis</i>     | Female | Strong   | Cip; Stx; Fos; Imi                | MDR      |
| 37P  | <i>Proteus mirabilis</i>     | Female | Strong   | Amc; Cip; Stx; Ak                 | MDR      |
| 90P  | <i>Proteus mirabilis</i>     | Female | Negative | Stx; Ctx; Caz                     | Non- MDR |
| 63P  | <i>Proteus mirabilis</i>     | Female | Moderate | Stx; Ctx; Caz; Gm; Fos            | MDR      |
| 25P  | <i>Proteus mirabilis</i>     | Female | Strong   | Gm; Stx; P/T; Fos                 | MDR      |
| 6P   | <i>Proteus mirabilis</i>     | Male   | Negative | Gm; Ak                            | Non- MDR |
| 7P   | <i>Proteus mirabilis</i>     | Male   | Negative | Amc; Cip                          | Non- MDR |

|     |                          |        |          |               |          |
|-----|--------------------------|--------|----------|---------------|----------|
| 62P | <i>Proteus mirabilis</i> | Female | Weak     | Amp; Amc; Ak  | Non- MDR |
| 31P | <i>Proteus mirabilis</i> | Female | Negative | Amp; Amc      | Non- MDR |
| 55P | <i>Proteus mirabilis</i> | Male   | Weak     | Amc; Cip      | Non- MDR |
| 93P | <i>Proteus mirabilis</i> | Male   | Weak     | Amc; P/T; Fos | Non- MDR |
| 1P  | <i>Proteus mirabilis</i> | Female | Negative | Ert; Mem      | Non- MDR |

**Abbreviation:** MDR= Multidrug-resistant bacteria, Non-MDR= Non Multidrug-resistant bacteria; Amp, ampicillin; Nor, norfloxacin; Amc, amoxicillin/clavulanic acid; Cip, ciprofloxacin; Sxt, trimethoprim/sulfamethoxazole; Ctx, cefotaxime; Caz, ceftazidime; Gm, Gentamycin; Fep, Cefepime; P/T, Piperacillin/tazobactam; Fos, fosfomycin; Nit, nitrofurantoin; Ert, ertapenem; Imi, imipenem; Ak, amikacin; Mem, meropenem.
